# Supplementary material
Source: PubMed Central journal article supplement (PMC2819654)

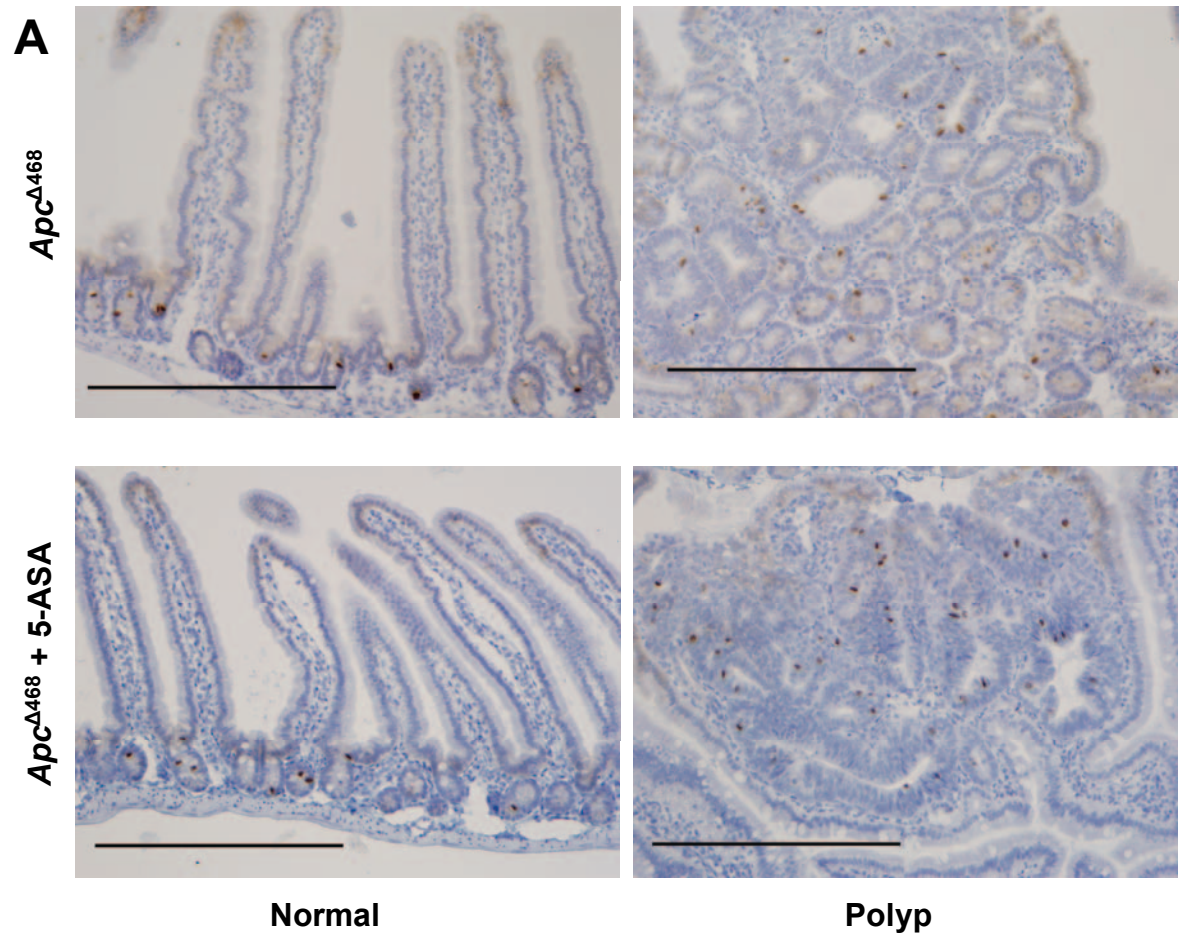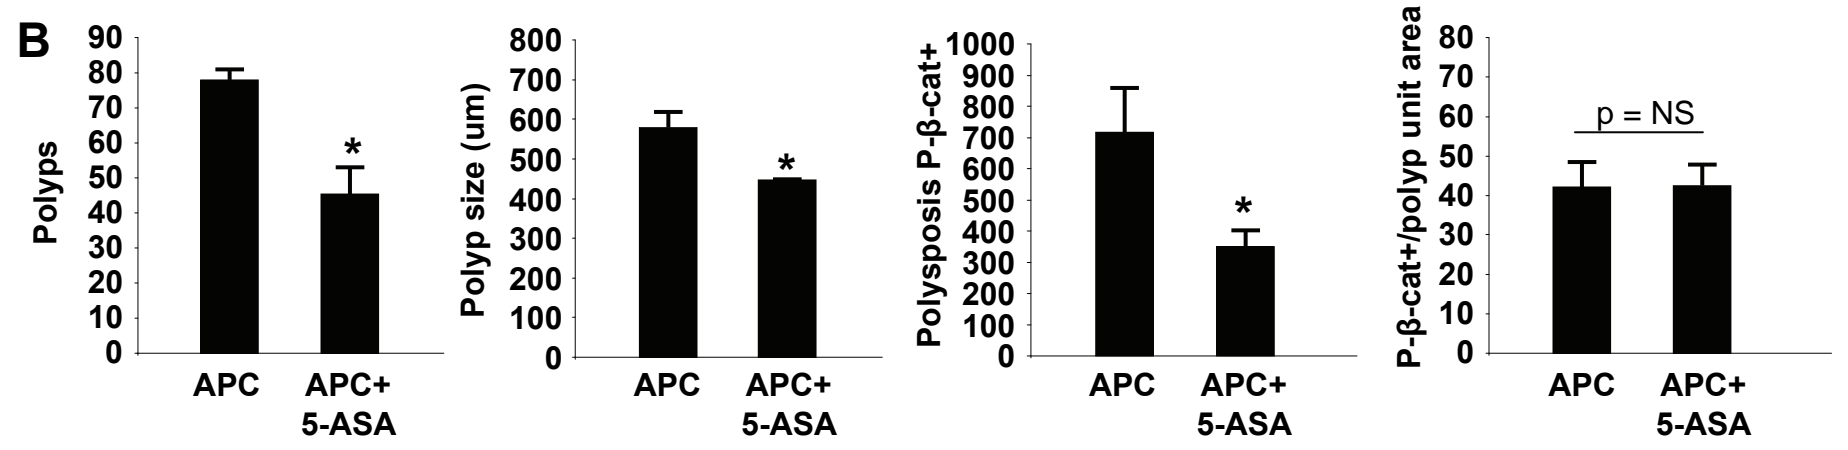

Supplement: NIHMS156322-supplement-02.pdf [file NIHMS156322-supplement-02.pdf]
